# Supplementary figures and images for: Genome-Based Exploration of Rhodococcus Species for Plastic-Degrading Genetic Determinants Using Bioinformatic Analysis
Source: MDPI journal article supplement (doi:10.3390/microorganisms10091846), 2022-09-15

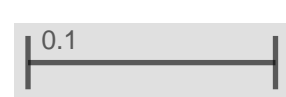

Supplement: s1 [file s1]
